# Supplementary material for: Therapists’ perspectives on using brain-computer interface-triggered functional electrical stimulation therapy for individuals living with upper extremity paralysis: a qualitative case series study
Source: Springer Nature journal article supplement (doi:10.1186/s12984-022-01107-2), 2022-11-23
Supplement: MOESM1 [file 23751512]

Semi-structured interview guide based on the COM-B model of behaviour change self-evaluation questionnaire described in ‘The Behaviour Change Wheel: a guide to designing interventions’ by Michie, Atkins and West (2014)

|                         |                                                                                                                                                                                                                                                                                                                                     |
|-------------------------|-------------------------------------------------------------------------------------------------------------------------------------------------------------------------------------------------------------------------------------------------------------------------------------------------------------------------------------|
|                         | Based on your experience delivering BCI-FEST, when it comes to you personally performing BCI-FEST for the upper extremity with a patient with stroke or SCI/D what do you think it would take for you to perform this regularly in clinical practice?<br>So, to deliver BCI-FEST to every appropriate patient would you have to.... |
| <b>COM-B components</b> | <b>Interview questions and probes</b>                                                                                                                                                                                                                                                                                               |
| Capability              | 1. Know more about why it is important? (e.g. have a better understanding of the benefits of behavioural planning; have a better understanding of the technology)                                                                                                                                                                   |
|                         | 2. Feel more comfortable performing BCI-FEST? [Probe: Describe the training you received.]                                                                                                                                                                                                                                          |
|                         | 3. Increase the physical skills that BCI-FEST delivery requires?                                                                                                                                                                                                                                                                    |
|                         | 4. Increase mental skills, like learning how to reason effectively or ‘thinking on your feet’ to deliver BCI-FEST?                                                                                                                                                                                                                  |
|                         | 5. Increase physical strength is required to deliver BCI-FEST?                                                                                                                                                                                                                                                                      |
|                         | 6. Develop mental strength, such as resilience against switching tasks too early (e.g. giving the patients enough time to initiate an upper limb movement before applying the stimulation)?                                                                                                                                         |
|                         | 7. Overcome physical limitations that you might have? (e.g. get around problems relating to disability)                                                                                                                                                                                                                             |
|                         | 8. Overcome mental obstacles? (e.g. reduce unwanted feelings or temptations)                                                                                                                                                                                                                                                        |
|                         | 9. Improve your physical stamina to deliver BCI-FEST?                                                                                                                                                                                                                                                                               |
|                         | 10. Improve your mental stamina to deliver BCI-FEST? (e.g. develop greater capacity to maintain mental effort)                                                                                                                                                                                                                      |
| Opportunity             | 11. Increase the amount of time need for set up? [Probe: How much time did you have to set up and complete a therapy session? Did you feel that this was enough time? Considering the set-up time, was there usually enough time to perform therapy?]                                                                               |
|                         | 12. Increase funding allocation for this device to be available clinically? [e.g. would the cost of this device be manageable clinically?] [Probe: Do you think that another option would work like renting?]                                                                                                                       |
|                         | 13. Have more support if you wanted to implement BCI-FEST clinically at your workplace? [Probe: funding, management, personnel, supporting equipment]                                                                                                                                                                               |
|                         | 14. Improve the accessibility of BCI-FEST? [Probe: How could you make it more accessible clinically?]                                                                                                                                                                                                                               |
|                         | 15. Be part of a group that performs BCI-FEST whether in your department or remotely across sites?                                                                                                                                                                                                                                  |
|                         | 16. Have more triggers to prompt you? (e.g. more reminders at strategic times)                                                                                                                                                                                                                                                      |
| Motivation              | 17. Feel a sense of satisfaction about delivering BCI-FEST?                                                                                                                                                                                                                                                                         |
|                         | 18. Feel that you need to do it enough? (e.g. care more about the negative consequences of not doing it)                                                                                                                                                                                                                            |
|                         | 19. Believe that it would be a good thing to do (e.g. have a stronger sense that you should do it)                                                                                                                                                                                                                                  |
|                         | 20. Develop better plans for doing it? (e.g. have a clearer and better developed plan for achieving it)                                                                                                                                                                                                                             |
|                         | 21. Develop a habit of doing it? (e.g. get into a pattern of doing it without having to think)                                                                                                                                                                                                                                      |
|                         | 22. Is there anything else that you would like to mention related to your capability, opportunity or motivation that would help you to deliver BCI-FEST clinically?                                                                                                                                                                 |
